# Supplementary material for: Histone deacetylases 1 and 2 silence cryptic transcription to promote mitochondrial function during cardiogenesis
Source: PubMed Central journal article supplement — Sci Adv. 2020 Apr 10;6(15):eaax5150. doi: 10.1126/sciadv.aax5150 (PMC7148095; doi:10.1126/sciadv.aax5150), 2020-04-10
Supplement: aax5150_SM.pdf [file aax5150_SM.pdf]

[advances.sciencemag.org/cgi/content/full/6/15/eaax5150/DC1](https://advances.sciencemag.org/cgi/content/full/6/15/eaax5150/DC1)

## Supplementary Materials for

### **Histone deacetylases 1 and 2 silence cryptic transcription to promote mitochondrial function during cardiogenesis**

Zachary J. Milstone, Sherin Saheera, Lauren M. Bourke, Tomer Shpilka, Cole M. Haynes, Chinmay M. Trivedi\*

\*Corresponding author. Email: [chinmay.trivedi@umassmed.edu](mailto:chinmay.trivedi@umassmed.edu).

Published 10 April 2020, *Sci. Adv.* **6**, eaax5150 (2020)  
DOI: 10.1126/sciadv.aax5150

#### **This PDF file includes:**

Supplementary Materials and Methods  
Supplementary Text  
Figs. S1 to S5

## Supplementary Materials

### Materials and Methods

#### Mitochondrial DNA (mtDNA)/Nuclear DNA (nDNA) Quantification

| Primers for mtDNA/nDNA Quantification |                      |                      |
|---------------------------------------|----------------------|----------------------|
| Target                                | Forward (5' – 3')    | Reverse (5' – 3')    |
| mMito                                 | CTAGAAACCCCGAAACCAA  | CCAGCTATCACCAAGCTCGT |
| nDNA                                  | ATGGGAAGCCGAACATACTG | CAGTCTCAGTGGGGGTGAAT |

Primers taken from: Malik, Afshan N., Anna Czajka, and Phil Cunningham. 2016. “Accurate Quantification of Mouse Mitochondrial DNA without Co-Amplification of Nuclear Mitochondrial Insertion Sequences.” *Mitochondrion* 29 (July): 59–64.

#### Rapid Amplification of cDNA Ends (RACE)

| Primers for 5'RACE |                            |
|--------------------|----------------------------|
| Target             | Reverse ((5' – 3'))        |
| CS (Exon 5)        | GGCTGCAACGCACGGCAGCTTGGCA  |
| Ndufb9 (Exon 4)    | TGGGCCGTTCCCGAGGTCTGGTCACA |

#### Chromatin Immunoprecipitation Quantitative PCR (ChIP-qPCR)

| Primers for ChIP-qPCR Analysis |                       |                       |
|--------------------------------|-----------------------|-----------------------|
| Target                         | Forward (5' – 3')     | Reverse (5' – 3')     |
| CS TSS <sup>C</sup>            | CCATTTTGGGCCAATGGTCTG | GGGGAAGGGTAGACAAACCG  |
| CS TSS <sup>A</sup>            | AAGTGCCACACTGTAAGCCT  | GGACAGCCTGAGTGAGTTTGA |
| Ndufb9 TSS <sup>C</sup>        | GAGGCTCACGACCAAGACAA  | GGAACCGGAAGGACGAGC    |
| Ndufb9 TSS <sup>A1</sup>       | TGCACCGTGCTGTTACTGAT  | ACCTCATCAACTTCAGGCCG  |
| Ndufb9 TSS <sup>A2</sup>       | AGCAGCCCCTTGAGTTTTGT  | GCTTCTCAGAGGGATGCCA   |

#### Quantitative Reverse Transcription PCR (RT-qPCR)

| Primers for Early/Late Exon Quantification |                           |                           |
|--------------------------------------------|---------------------------|---------------------------|
| Target                                     | Forward (5' – 3')         | Reverse (5' – 3')         |
| Gapdh                                      | ATGTTCCAGTATGACTCCACTCACG | GAAGACACCAGTAGACTCCACGACA |
| CS Early                                   | TTGGGAGCCAAGAACTCATCCTG   | TCATGTCCACAGTGATCTGGC     |
| CS Late 6-7                                | ACAGTGAAAGCAACTTCGCC      | TCAATGGCTCCGATACTGCTG     |
| Ndufb9 Early                               | GAAGGTGCTGCGGCTGTATAA     | TACCGGTACTGTCCCTGTGG      |
| Ndufb9 Late                                | GGCATCCCTCTGAGAAAGCA      | GCTTAACCTCCCGATCCCAG      |

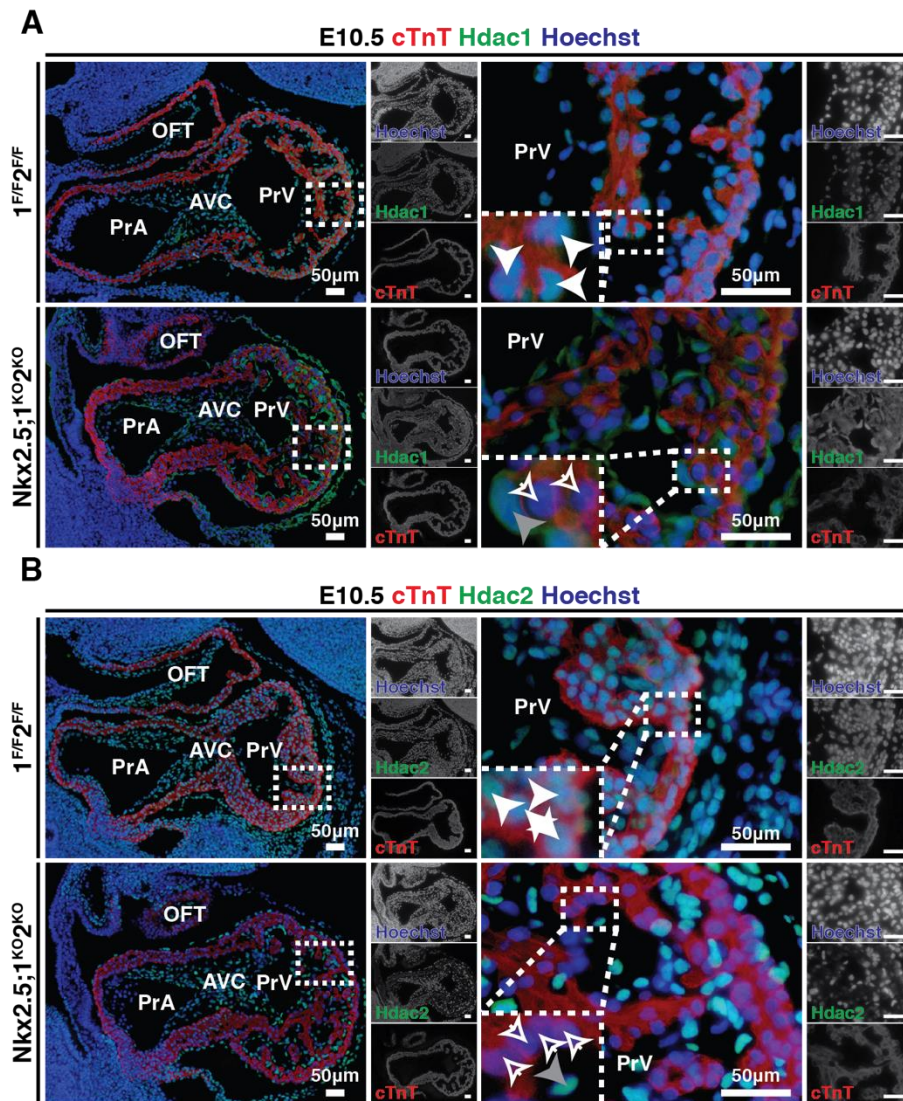

**Fig. S1. Complete loss of Hdac1 and Hdac2 in primitive heart tube cardiomyocytes by E10.5.**

(A-B) Hdac1 (A) and Hdac2 (B) staining on *Nkx2.5;1<sup>KO</sup>/2<sup>KO</sup>* and *1<sup>FF</sup>/2<sup>FF</sup>* E10.5 sagittal sections at AVC level with cardiac troponin (cTnT) and Hoechst nuclear counterstain (solid white arrows, Hdac1<sup>+</sup> or Hdac2<sup>+</sup> cardiomyocytes; hollow white arrows, Hdac1<sup>-</sup> or Hdac2<sup>-</sup> cardiomyocytes; gray arrows, Hdac1<sup>+</sup>/cTnT<sup>-</sup> or Hdac2<sup>+</sup>/cTnT<sup>-</sup> cells). Grayscale images are unedited. OFT, outflow tract; PrA, primitive atria; AVC, atrioventricular canal; PrV, primitive ventricle.

**A Mitochondrial Biogenesis (R-MMU-1592230)**

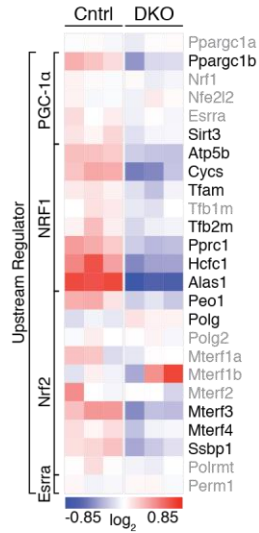

**B Mitophagy (R-MMU-5205647)**

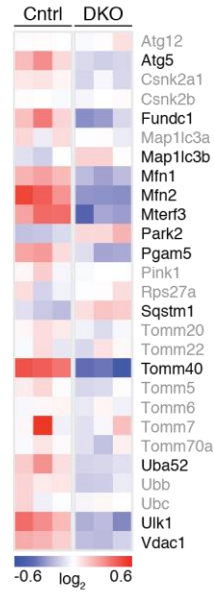

**C TCA Cycle (WP434)**

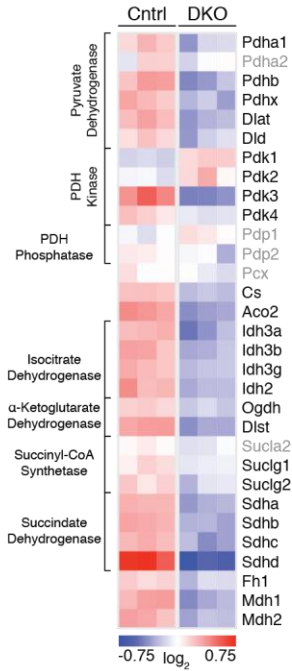

**D**

**Electron Transport Chain (WP295)**

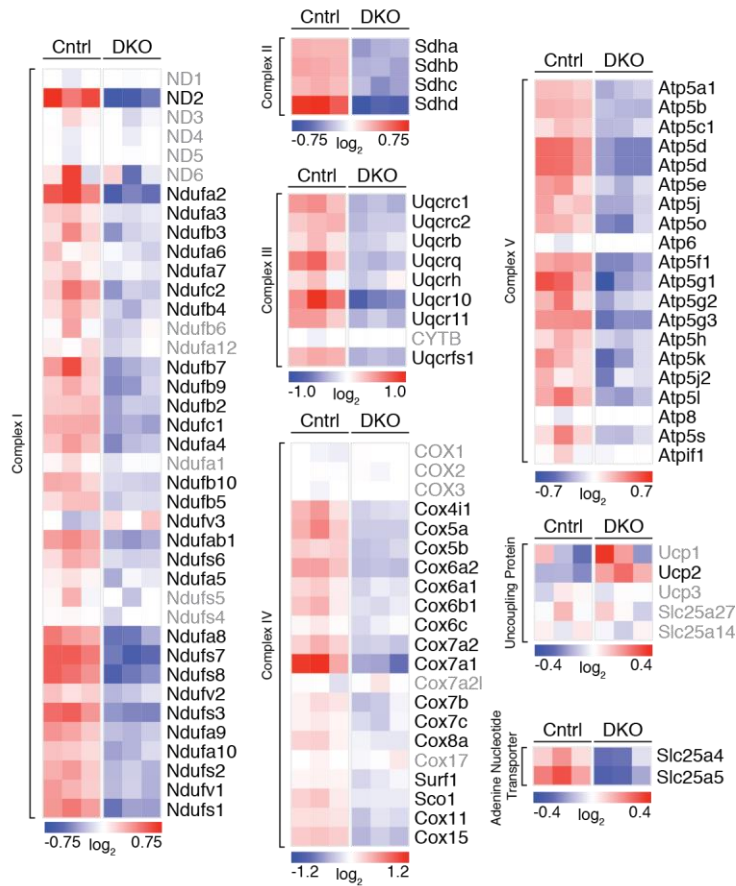

**Fig. S2. Loss of Hdac1/Hdac2 causes downregulation of metabolic and cardiac gene programs without concordant upstream changes.**

(A) Heatmap of Mitochondrial Biogenesis Reactome gene set (R-MMU-1592230). (B) Heatmap of Mitophagy Reactome gene set (R-MMU-5205647). (C) Heatmap of Tricarboxylic Acid Cycle (TCA Cycle) WikiPathways gene set (WP434). (D) Heatmap of Electron Transport Chain WikiPathways gene set (WP295) separated by individual chain components/complexes. Black text, significantly changed (FDR<0.05); gray text, not significantly changed (FDR>0.05).

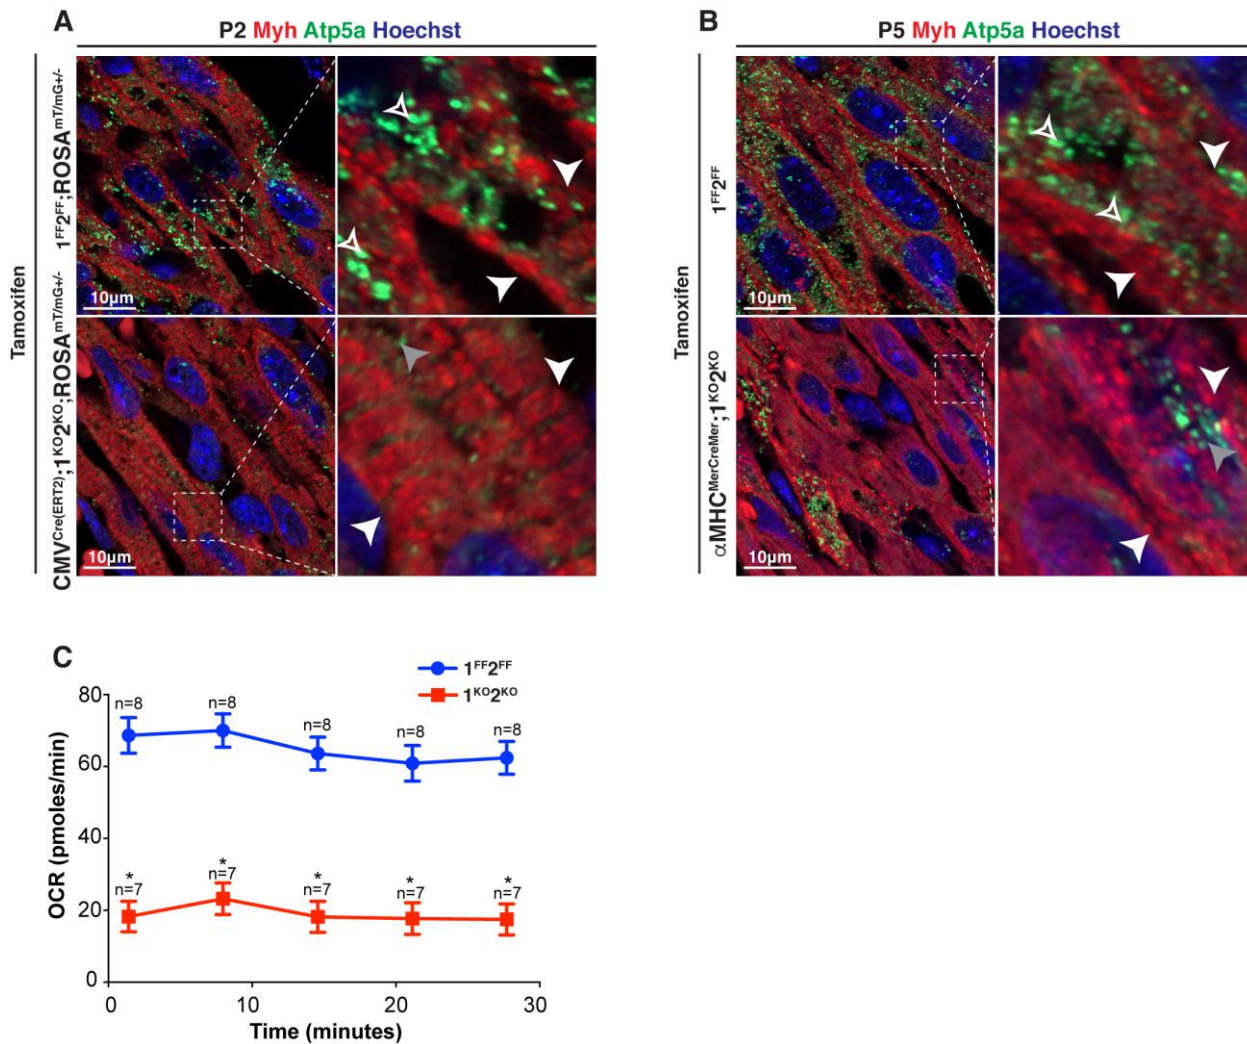

**Fig. S3. Inducible loss of Hdac1 and Hdac2 in postnatal hearts lead to downregulation of critical mitochondrial protein and reduced oxygen consumption.**

(A-B) Atp5a (Green) and Myh (Red) co-staining on tamoxifen treated  $CMV^{Cre(ERT2)};I^{KO2^{KO}};ROSA^{mTmG+/-}$  (A),  $\alpha MHC^{MerCreMer};I^{KO2^{KO}}$  (B), and  $I^{FF2^{FF}}$  (A-B) P2 (A) and P5 (B) heart frontal sections with Hoechst nuclear counterstain. (solid white arrows, Myh<sup>+</sup> contractile network; hollow white arrows, Atp5a<sup>+</sup> cardiomyocytes; gray arrows, reduced Atp5a expression in cardiomyocytes). (C) Oxygen consumption rate (OCR) at multiple time points in neonatal P2 cardiomyocytes derived from P0  $I^{FF2^{FF}}$  hearts infected with control virus ( $I^{FF2^{FF}}$ ) or with Cre-expressing virus ( $I^{KO2^{KO}}$ ). Data represent the mean  $\pm$  SEM. \*P<0.00003. Statistical significance determined using the Holm-Sidak method, with alpha = 0.05.



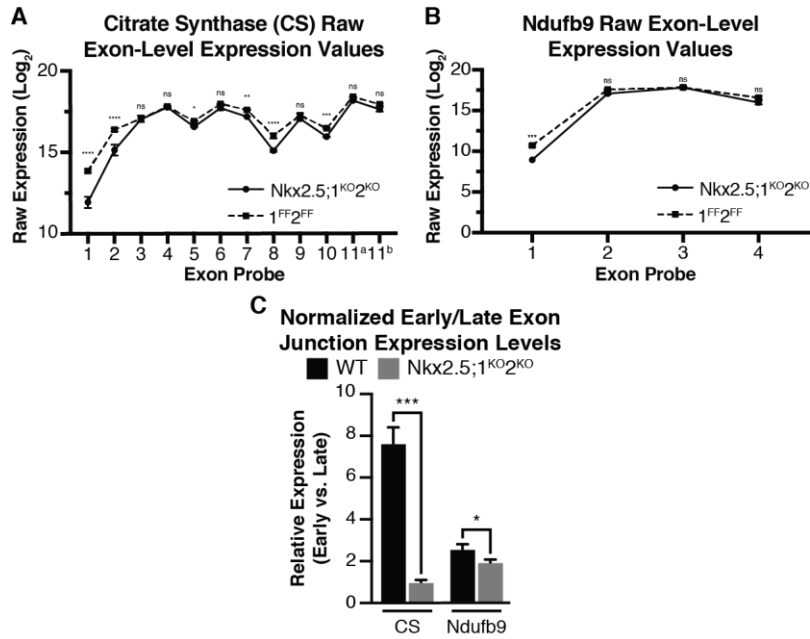

**Fig. S4. Loss of Hdac1/Hdac2 causes downregulation of metabolic and cardiac gene programs without concordant upstream changes.**

(A-B) Raw exon-level expression values ( $\log_2$ ) for citrate synthase (*CS*, A) and *Ndufb9* (B) in *Nkx2.5;1<sup>KO2KO</sup>* and *1<sup>FF2FF</sup>* E10.5 PHTs. (C) RT-qPCR showing the relative abundance of *CS* or *Ndufb9* transcripts spanning an early exon junction (*CS* – Exon 1-2; *Ndufb9* – Exon 1-2) compared to late exon junction (*CS* – Exon 6-7; *Ndufb9* – Exon 3-4) in *Nkx2.5;1<sup>KO2KO</sup>* and *1<sup>++2++</sup>* E10.5 PHTs.

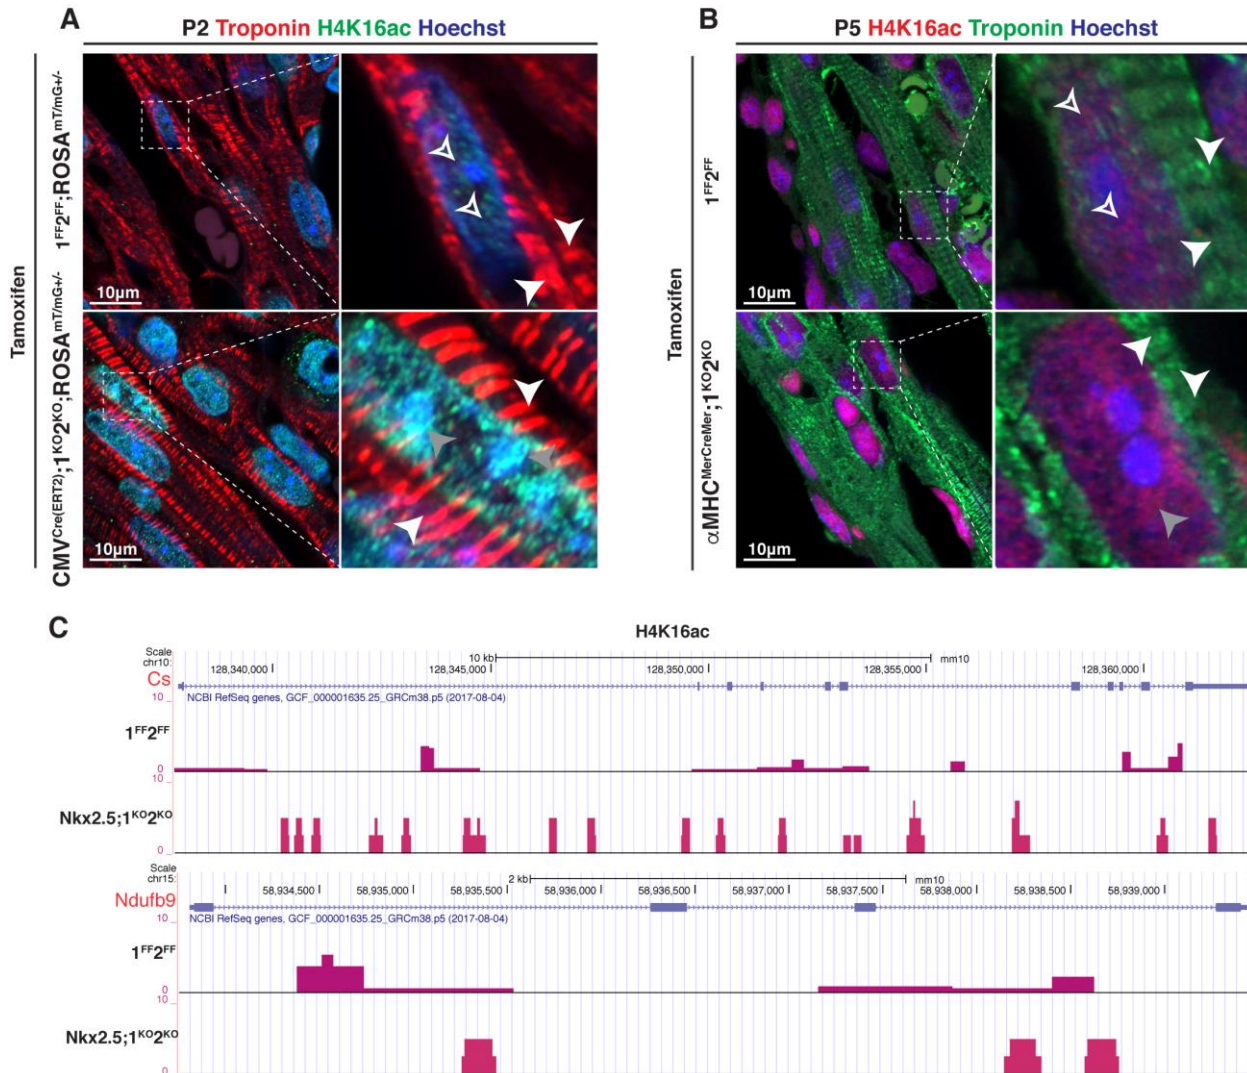

**Fig. S5. Inducible loss of Hdac1 and Hdac2 in postnatal hearts leads to increased H4K16ac.** (A-B) H4K16 and Troponin co-staining on tamoxifen treated  $CMV^{Cre(ERT2)};I^{KO2}{}^{KO};ROSA^{mTmG+/-}$  (A),  $\alpha MHC^{MerCreMer};I^{KO2}{}^{KO}$  (B), and  $I^{FF2}{}^{FF}$  (A-B) P2 (A) and P5 (B) heart frontal sections with Hoechst nuclear counterstain. (solid white arrows, Troponin<sup>+</sup> cardiomyocytes; hollow white arrows, H4K16ac<sup>+</sup> cardiomyocytes; gray arrows, increased H4K16ac foci in cardiomyocytes). (C) Browser tracks of *Cs* (top) and *Ndufb9* (bottom) showing H4K16ac enrichment in  $I^{FF2}{}^{FF}$  and  $Nkx2.5;I^{KO2}{}^{KO}$  E10.5 primitive heart tubes.
